# Supplementary material for: NPC1 deficiency impairs cerebellar postnatal development of microglia and climbing fiber refinement in a mouse model of Niemann–Pick disease type C
Source: PubMed Central journal article supplement (PMC7420841; doi:10.1242/dev.189019), 2020-08-03
Supplement: develop-147-189019-s1.pdf [file develop-147-189019-s1.pdf]

## Supplementary Information

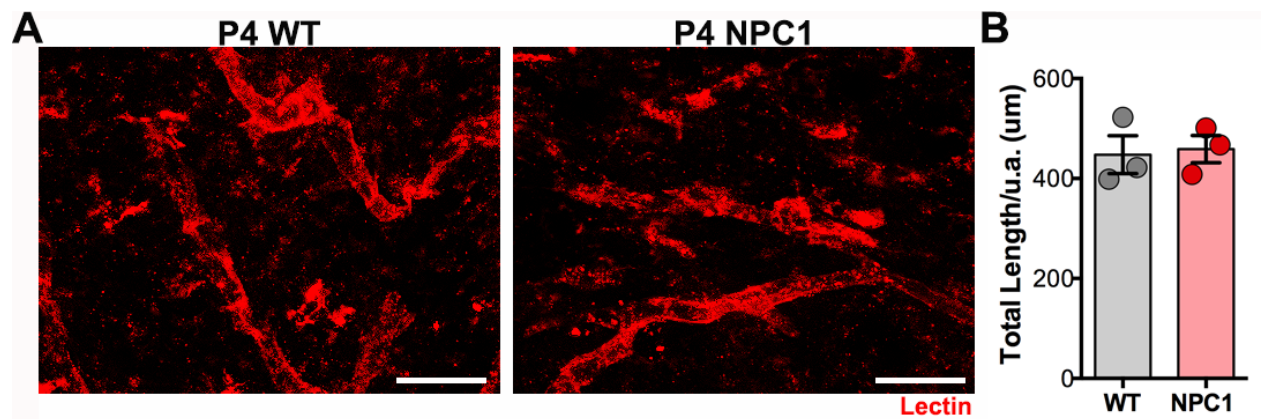

**Fig. S1.** Capillary density in the cerebellar WMR is similar between WT and *Npc1<sup>nmf164</sup>* mice at P4. A) Sample images showing Lectin<sup>+</sup> capillaries in the WMR of P4 WT and *Npc1<sup>nmf164</sup>* mice. B) Quantitative analysis of the total length of Lectin<sup>+</sup> capillaries in the WMR shows no differences between P4 WT and *Npc1<sup>nmf164</sup>* mice. Data are presented as mean  $\pm$  SEM (B) n= 3 mice. Scale bars: (A) 20 $\mu$ m.

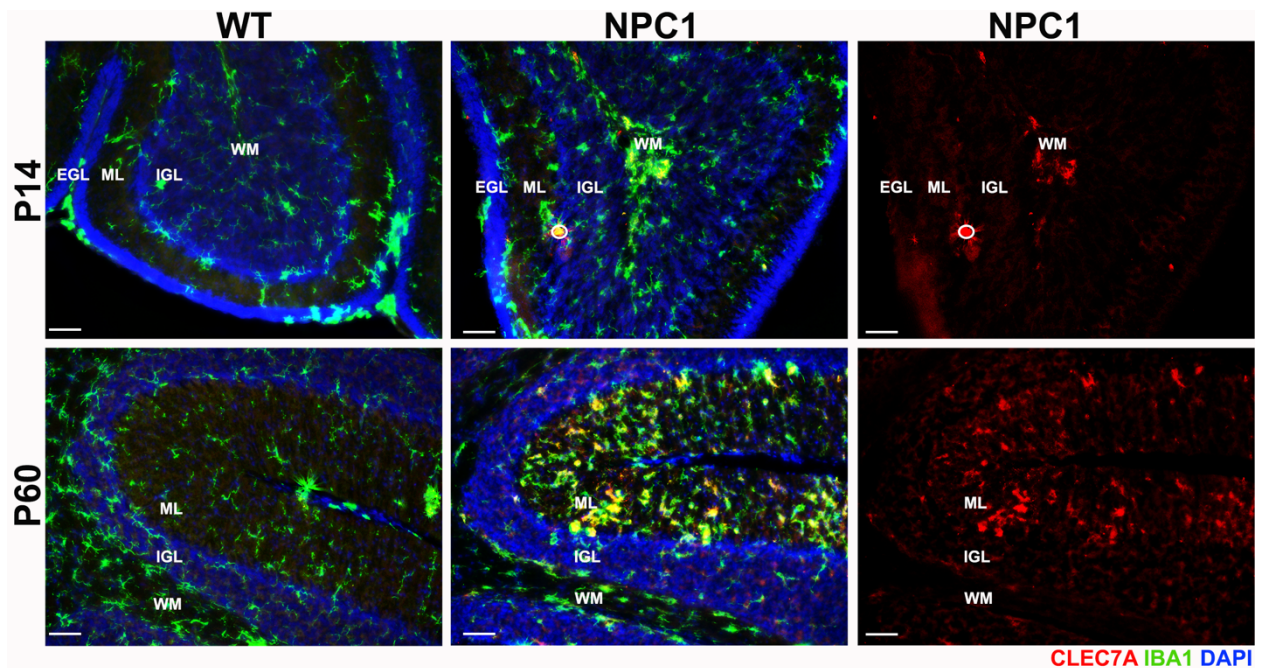

**Fig. S2.** Reappearance of CLEC7A in microglia is observed at P60 when PC degeneration and inflammatory activation of microglia are occurring. At P14, CLEC7A<sup>+</sup> microglia were barely detected in the cerebellar white matter (WM) region (or any other region) in WT and *Npc1<sup>nmf164</sup>* mice. At P60, the appearance of CLEC7A<sup>+</sup> microglia is evident primarily at the ML where PC dendrite degeneration is occurring. White circle is indicating an artifact. Scale bars: (A) 50 $\mu$ m
